# Supplementary material
Source: MDPI journal article supplement (https://www.mdpi.com/2073-4395/13/4/964)
Supplement: s1 [file s1]

Table S1 Multiple linear regression model Summary

| Model | R                 | R Square | Adjusted R Square | Std. Error of the Estimate | Change Statistics |          |     |     |               | Durbin-Watson |
|-------|-------------------|----------|-------------------|----------------------------|-------------------|----------|-----|-----|---------------|---------------|
|       |                   |          |                   |                            | R Square Change   | F Change | df1 | df2 | Sig. F Change |               |
| 1     | .841 <sup>a</sup> | .707     | .677              | .23115                     | .707              | 24.102   | 1   | 10  | .001          |               |
| 2     | .909 <sup>b</sup> | .826     | .788              | .18744                     | .120              | 6.207    | 1   | 9   | .034          | 2.132         |

- a. Predictors: (Constant), mpc1  
b. Predictors: (Constant), mpc1, M1  
c. Dependent Variable: OB

Table S2 Indicator species information table in module #1

| ASV                               | King dom  | Phylum                   | Class                | Order                | Family              | Genus         | Species                     | Fold change (CC vs NOR) | Biom arker |
|-----------------------------------|-----------|--------------------------|----------------------|----------------------|---------------------|---------------|-----------------------------|-------------------------|------------|
| a6886436ce2477676a9c4daca0bd9d13  | Fung i    | Rozellomycota            | unidentified         | unidentifie d        | unidentified        | unidenti fied | unidentified                | 0.000538921             | NOR        |
| b5ed84deade42b8c47728edd84ddced2  | Bact eria | Chloroflexi              | KD4-96               | KD4-96               | KD4-96              | KD4-96        | uncultured_bac terium       | 0.00171073              | NOR        |
| aed787becb355d0e176762de9d7393ff  | Bact eria | Chloroflexi              | KD4-96               | KD4-96               | KD4-96              | KD4-96        | NA                          | 0.001754206             | NOR        |
| 99cf1750a54711e2bce46394da8df914  | Bact eria | Firmicutes               | Bacilli              | Bacillales           | Bacillaceae         | Bacillus      | Bacillus_batavi ensis       | 0.002177371             | NOR        |
| 7befc6178a7ef82cffd c0611ba10317d | Bact eria | Proteobacteria           | Alphaprote obacteria | Rhizobiale s         | Xanthobact eraceae  | NA            | NA                          | 0.002767571             | NOR        |
| 3d9fc7bd5c4609c7eff d922967d1c968 | Bact eria | Acidobacteriot a         | Subgroup_1 8         | Subgroup_ 18         | Subgroup_ 18        | Subgrou p_18  | uncultured_bac terium       | 0.003890187             | NOR        |
| 2116292b376dde9519a7f12cc76f4e4c  | Bact eria | Acidobacteriot a         | Blastocatell ia      | Pyrinomon adales     | Pyrinomon adaceae   | RB41          | uncultured_Aci dobacteria   | 0.006429867             | NOR        |
| c2d4f0b1a972493ff4f fef8ca269c07a | Fung i    | unassigned               | NA                   | NA                   | NA                  | NA            | NA                          | 0.039679121             | NOR        |
| ef6641185ab0fa2c3442d8b5f4c87af8  | Bact eria | Actinobacteriot a        | Actinobacte ria      | Propioniba cteriales | Nocardioid aceae    | Nocardi oides | NA                          | 0.04288568              | NOR        |
| 2a706be6d37fcbf1b04add91987ddc5c  | Bact eria | Proteobacteria           | Alphaprote obacteria | Sphingom onadales    | Sphingomo nadaceae  | Sphingo bium  | NA                          | 0.086861763             | NOR        |
| b65edd5d001d3668dc59db6f69c1be1f  | Bact eria | Proteobacteria           | Gammaprot eobacteria | Burkholde riales     | Nitrosomon adaceae  | MND1          | uncultured_Bu rkholderiales | 0.153925758             | NOR        |
| 0a8f178dfb8da47b79d1197d09388268  | Bact eria | Actinobacteriot a        | Actinobacte ria      | Micrococc ales       | Intrasporan giaceae | Terrabac ter  | Terrabacter_sp.             | 0.163158097             | NOR        |
| 3aff84b9ca4f608791de878a14f5bd6d  | Bact eria | Actinobacteriot a        | Thermoleop hilia     | Gaiellales           | Gaiellaceae         | Gaiella       | NA                          | 0.275786966             | NOR        |
| 0e2bc71bef131ab2c6c2053f2a3ac318  | Bact eria | Gemmatimoun assigneddota | Gemmatim onadetes    | Gemmati monadales    | Gemmatim onadaceae  | Gemmat imonas | NA                          | 0.295628433             | NOR        |
| 75e6d2e0e8e2f524a7ea5605c410eeac  | Bact eria | Gemmatimoun assigneddota | Gemmatim onadetes    | Gemmati monadales    | Gemmatim onadaceae  | uncultur ed   | NA                          | 0.345869371             | NOR        |

|                                  |          |                   |                     |                 |                   |              |                        |             |     |
|----------------------------------|----------|-------------------|---------------------|-----------------|-------------------|--------------|------------------------|-------------|-----|
| 4fd72f3551ce1fe631769dbffd841360 | Bacteria | Proteobacteria    | Alphaproteobacteria | Rhizobiales     | Beijerinckiaceae  | Microvirga   | NA                     | 0.44481961  | NOR |
| 5eeb1cd3b5b89f057f105b554736f049 | Fungi    | unassigned        | NA                  | NA              | NA                | NA           | NA                     | 1.655381003 | CC  |
| 968992fc75554f39fb4d60aebced3050 | Fungi    | Ascomycota        | Dothideomycetes     | Pleosporales    | Didymellaceae     | Didymella    | NA                     | 2.325551333 | CC  |
| a90f7820f8c8240177be68191aa0cab6 | Fungi    | Mortierellomycota | Mortierellomyces    | Mortierellales  | Mortierellaceae   | Mortierella  | Mortierella_amoeboides | 2.338692253 | CC  |
| ee3301596353115d984dc0c9664e878c | Fungi    | Mortierellomycota | Mortierellomyces    | Mortierellales  | Mortierellaceae   | Mortierella  | Mortierella_alpina     | 2.365826013 | CC  |
| ffbbcc236e64e00f8314f36440ca58a1 | Fungi    | Ascomycota        | Sordariomycetes     | Hypocreales     | Stachybotryaceae  | NA           | NA                     | 2.619664375 | CC  |
| 38317f0098ab7993ccd4f752eb9831c7 | Fungi    | Ascomycota        | Eurotiomycetes      | Chaetothyriales | unidentified      | unidentified | unidentified           | 3.194552522 | CC  |
| b99f2e16b143e67b97f1e024ad44524a | Fungi    | Ascomycota        | Sordariomycetes     | Xylariales      | Microdochaceae    | Microdochium | Microdochium_paspali   | 3.679983846 | CC  |
| 43a95e01a5c67f3480668bd5c2851c34 | Fungi    | Ascomycota        | Pezizomyces         | Pezizales       | Ascodesmidaceae   | Cephalophora | unidentified           | 4.002834817 | CC  |
| 3baaa1a55f67a004e5bdf88baecff544 | Fungi    | Ascomycota        | Sordariomycetes     | Hypocreales     | Nectriaceae       | Gibberella   | Gibberella_intricans   | 4.149172212 | CC  |
| c1805b5d501009a19b1d6589de9b00d4 | Fungi    | Ascomycota        | Sordariomycetes     | Sordariales     | Lasiosphaeriaceae | Cladorrhinum | NA                     | 5.677996318 | CC  |
| a0d9f93e678f593c59f226cc94c0615a | Fungi    | Ascomycota        | Sordariomycetes     | Sordariales     | Chaetomiaceae     | Chaetomium   | NA                     | 29.9936698  | CC  |
